# Supplementary material for: Identification and Expression Analysis of the Populus trichocarpa GASA-Gene Family
Source: MDPI journal article supplement (doi:10.3390/ijms23031507), 2022-01-28
Supplement: s1 [file s1]

**Table S3.** Prediction of subcellular localization of PtGASA gene.

| Accession number | Predicted location(s)                               |
|------------------|-----------------------------------------------------|
| <i>PtGASA01</i>  | Golgi apparatus.                                    |
| <i>PtGASA02</i>  | Cell membrane. Golgi apparatus. Nucleus.            |
| <i>PtGASA03</i>  | Golgi apparatus.                                    |
| <i>PtGASA04</i>  | Cell wall.                                          |
| <i>PtGASA05</i>  | Cell membrane. Cell wall. Golgi apparatus. Nucleus. |
| <i>PtGASA06</i>  | Cell wall. Golgi apparatus.                         |
| <i>PtGASA07</i>  | Cell wall.                                          |
| <i>PtGASA08</i>  | Cell wall. Golgi apparatus.                         |
| <i>PtGASA09</i>  | Cell membrane. Golgi apparatus. Nucleus.            |
| <i>PtGASA10</i>  | Cell wall.                                          |
| <i>PtGASA11</i>  | Golgi apparatus.                                    |
| <i>PtGASA12</i>  | Golgi apparatus. Nucleus.                           |
| <i>PtGASA13</i>  | Nucleus.                                            |
| <i>PtGASA14</i>  | Golgi apparatus. Nucleus.                           |
| <i>PtGASA15</i>  | Golgi apparatus.                                    |
| <i>PtGASA16</i>  | Nucleus.                                            |
| <i>PtGASA17</i>  | Golgi apparatus.                                    |
| <i>PtGASA18</i>  | Golgi apparatus. Nucleus.                           |
| <i>PtGASA19</i>  | Golgi apparatus. Nucleus.                           |
