# Supplementary material for: Identification and Expression Analysis of the Populus trichocarpa GASA-Gene Family
Source: MDPI journal article supplement (doi:10.3390/ijms23031507), 2022-01-28
Supplement: s1 [file s1]

**Table S1.** Orthologues of *PtGASA* genes in *Arabidopsis* and apple.

| No. | Gene name       | Homologous gene | Identify(%) |
|-----|-----------------|-----------------|-------------|
| 1   | <i>PtGASA06</i> | <i>AtGASA01</i> | 72.97       |
| 2   | <i>PtGASA06</i> | <i>AtGASA11</i> | 67.11       |
| 3   | <i>PtGASA07</i> | <i>AtGASA01</i> | 66.34       |
| 4   | <i>PtGASA08</i> | <i>AtGASA11</i> | 66.33       |
| 5   | <i>PtGASA09</i> | <i>AtGASA01</i> | 72.97       |
| 6   | <i>PtGASA12</i> | <i>AtGASA10</i> | 65          |
| 7   | <i>PtGASA15</i> | <i>AtGASA10</i> | 65.17       |
| 8   | <i>PtGASA17</i> | <i>AtGASA04</i> | 67.59       |
| 9   | <i>PtGASA18</i> | <i>AtGASA05</i> | 65          |
| 1   | <i>PtGASA01</i> | <i>MdGASA02</i> | 79.44       |
| 2   | <i>PtGASA01</i> | <i>MdGASA18</i> | 67.57       |
| 3   | <i>PtGASA02</i> | <i>MdGASA04</i> | 73.33       |
| 4   | <i>PtGASA02</i> | <i>MdGASA19</i> | 67.05       |
| 5   | <i>PtGASA02</i> | <i>MdGASA06</i> | 65          |
| 6   | <i>PtGASA05</i> | <i>MdGASA05</i> | 67.65       |
| 7   | <i>PtGASA06</i> | <i>MdGASA05</i> | 69.61       |
| 8   | <i>PtGASA06</i> | <i>MdGASA15</i> | 76.83       |
| 9   | <i>PtGASA07</i> | <i>MdGASA05</i> | 67.65       |
| 10  | <i>PtGASA09</i> | <i>MdGASA05</i> | 67.65       |
| 11  | <i>PtGASA09</i> | <i>MdGASA15</i> | 74.39       |
| 12  | <i>PtGASA10</i> | <i>MdGASA02</i> | 65          |
| 13  | <i>PtGASA10</i> | <i>MdGASA18</i> | 65          |
| 14  | <i>PtGASA12</i> | <i>MdGASA04</i> | 73.03       |
| 15  | <i>PtGASA12</i> | <i>MdGASA06</i> | 67.82       |
| 16  | <i>PtGASA12</i> | <i>MdGASA19</i> | 65.52       |
| 17  | <i>PtGASA15</i> | <i>MdGASA01</i> | 73.86       |
| 18  | <i>PtGASA15</i> | <i>MdGASA04</i> | 67.07       |
| 19  | <i>PtGASA15</i> | <i>MdGASA06</i> | 75          |
| 20  | <i>PtGASA15</i> | <i>MdGASA07</i> | 75          |
| 21  | <i>PtGASA15</i> | <i>MdGASA19</i> | 67.82       |
| 22  | <i>PtGASA17</i> | <i>MdGASA11</i> | 81.31       |
| 23  | <i>PtGASA17</i> | <i>MdGASA25</i> | 79.44       |
| 24  | <i>PtGASA18</i> | <i>MdGASA13</i> | 73.68       |
| 25  | <i>PtGASA18</i> | <i>MdGASA26</i> | 72.37       |
