# Supplementary material for: Identification and Expression Analysis of the Populus trichocarpa GASA-Gene Family
Source: MDPI journal article supplement (doi:10.3390/ijms23031507), 2022-01-28
Supplement: s1 [file s1]

**Table S2.** *PtGASA* genes primer.

| Gene ID         | Forward primer<br>(Reverse primer) | Primer Sequence              |
|-----------------|------------------------------------|------------------------------|
| <i>PtGASA01</i> | F                                  | GGGCCACTCAAGGCAGTCTTC        |
| <i>PtGASA01</i> | R                                  | CGGGAGGCACACACAAGCAC         |
| <i>PtGASA02</i> | F                                  | ATACGAGGTGCGCAAACGCT         |
| <i>PtGASA02</i> | R                                  | AGGGCACTCGTGCTTGTTCC         |
| <i>PtGASA03</i> | F                                  | GATTGCCCAGAAGCCTGCGA         |
| <i>PtGASA03</i> | R                                  | GGCACTTGGGTTTGCCCTCTT        |
| <i>PtGASA04</i> | F                                  | CATCTCCAGCACCGCCAGTC         |
| <i>PtGASA04</i> | R                                  | GCTTCACGGGAGGCACAGG          |
| <i>PtGASA05</i> | F                                  | GCAAGTCCAGCTGCAGGTTCT        |
| <i>PtGASA05</i> | R                                  | GGTGGCATAGCAAGGGCAAGT        |
| <i>PtGASA06</i> | F                                  | CACGCCTGTGCAAGAGAGCA         |
| <i>PtGASA06</i> | R                                  | TCTGCCGCCATGGGTAGTCA         |
| <i>PtGASA07</i> | F                                  | ATCGACTGTGGTGGCGCTTG         |
| <i>PtGASA07</i> | R                                  | ACACTTGCGTCTGCCTCCAC         |
| <i>PtGASA08</i> | F                                  | CACCGAGCGTGTGGTACCTG         |
| <i>PtGASA08</i> | R                                  | TGCTGGCCATGGTGAGTTGTC        |
| <i>PtGASA09</i> | F                                  | CGAGGCGAGGTGCCAGTTATC        |
| <i>PtGASA09</i> | R                                  | CCGTTCTGGAGGCACACAG          |
| <i>PtGASA10</i> | F                                  | AAGAGTGCGGACCTCGTTGC         |
| <i>PtGASA10</i> | R                                  | GGCACACACAAGCACTTGGC         |
| <i>PtGASA11</i> | F                                  | GTGCAAGGCTAGGTGTGCCA         |
| <i>PtGASA11</i> | R                                  | GGGCATTTGGAGGTGCCCTT         |
| <i>PtGASA12</i> | F                                  | GCGCAAACGCTGGCATAACAG        |
| <i>PtGASA12</i> | R                                  | GGGCACTCATGCTTGTTCCCA        |
| <i>PtGASA13</i> | F                                  | TGCAAGCAGAGATGCAGTCTTCAC     |
| <i>PtGASA13</i> | R                                  | CCTGAGGTCCCAGGAGGCA          |
| <i>PtGASA14</i> | F                                  | GCATAAGGGCTTGCAACACATGC      |
| <i>PtGASA14</i> | R                                  | GCATAGCAAGGGCAGGTATCTTCG     |
| <i>PtGASA15</i> | F                                  | AGTGCTCAGTGAGGTGCTCCA        |
| <i>PtGASA15</i> | R                                  | AGGGCACTCGTGCTTGTTCC         |
| <i>PtGASA16</i> | F                                  | GTGGAAACAGGAGGCTCATGCAA      |
| <i>PtGASA16</i> | R                                  | GCGGCACACACTTGACCTT          |
| <i>PtGASA17</i> | F                                  | TGGACCTGGGAGTCTCAAGAGC       |
| <i>PtGASA17</i> | R                                  | ACGCAGAGGCACTTCTTGACAG       |
| <i>PtGASA18</i> | F                                  | CCGCTGCTCAGCAACATCACA        |
| <i>PtGASA18</i> | R                                  | AGGGCATGTTTCCTTGTTGCCAT      |
| <i>PtGASA19</i> | F                                  | GCTGCAACAGATGCCGGTGT         |
| <i>PtGASA19</i> | R                                  | CCATGGGTCCTAAGGCTTGACATAACAT |
