# Supplementary figures and images for: Identification and Expression Analysis of the Populus trichocarpa GASA-Gene Family
Source: MDPI journal article supplement (doi:10.3390/ijms23031507), 2022-01-28

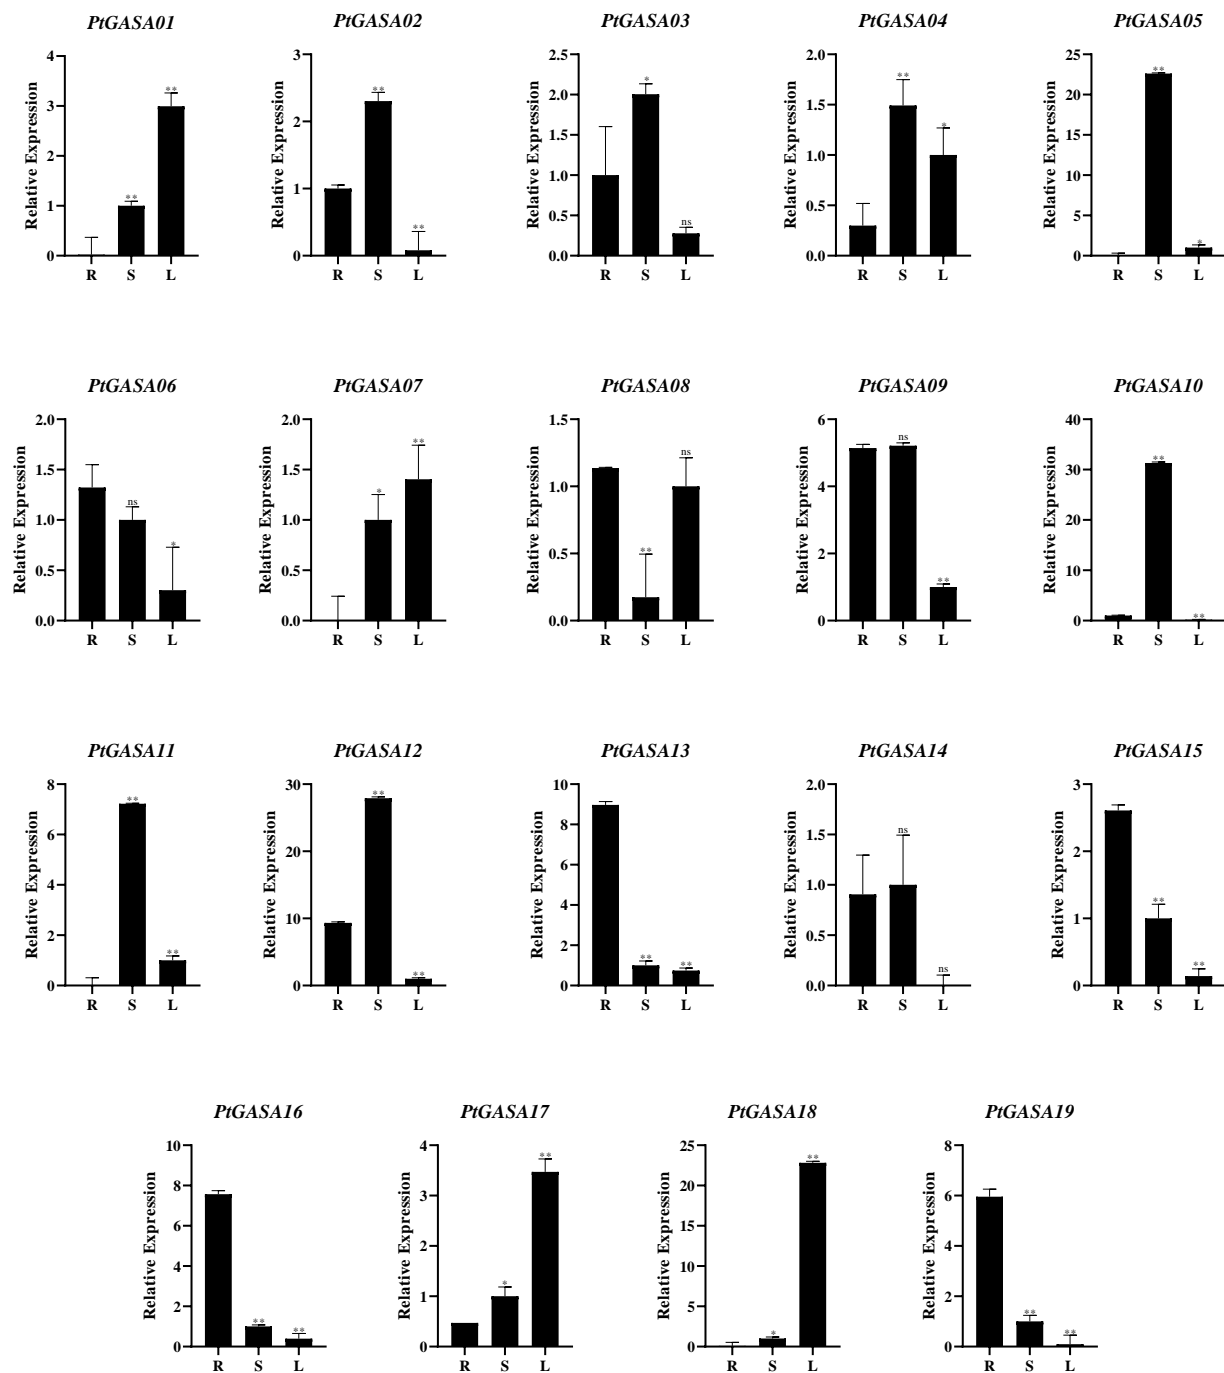

**Figure S2.** Analysis of *PtGASA* expression levels in different tissues (roots, stems, and leaves).

Supplement: s1 [file s1]

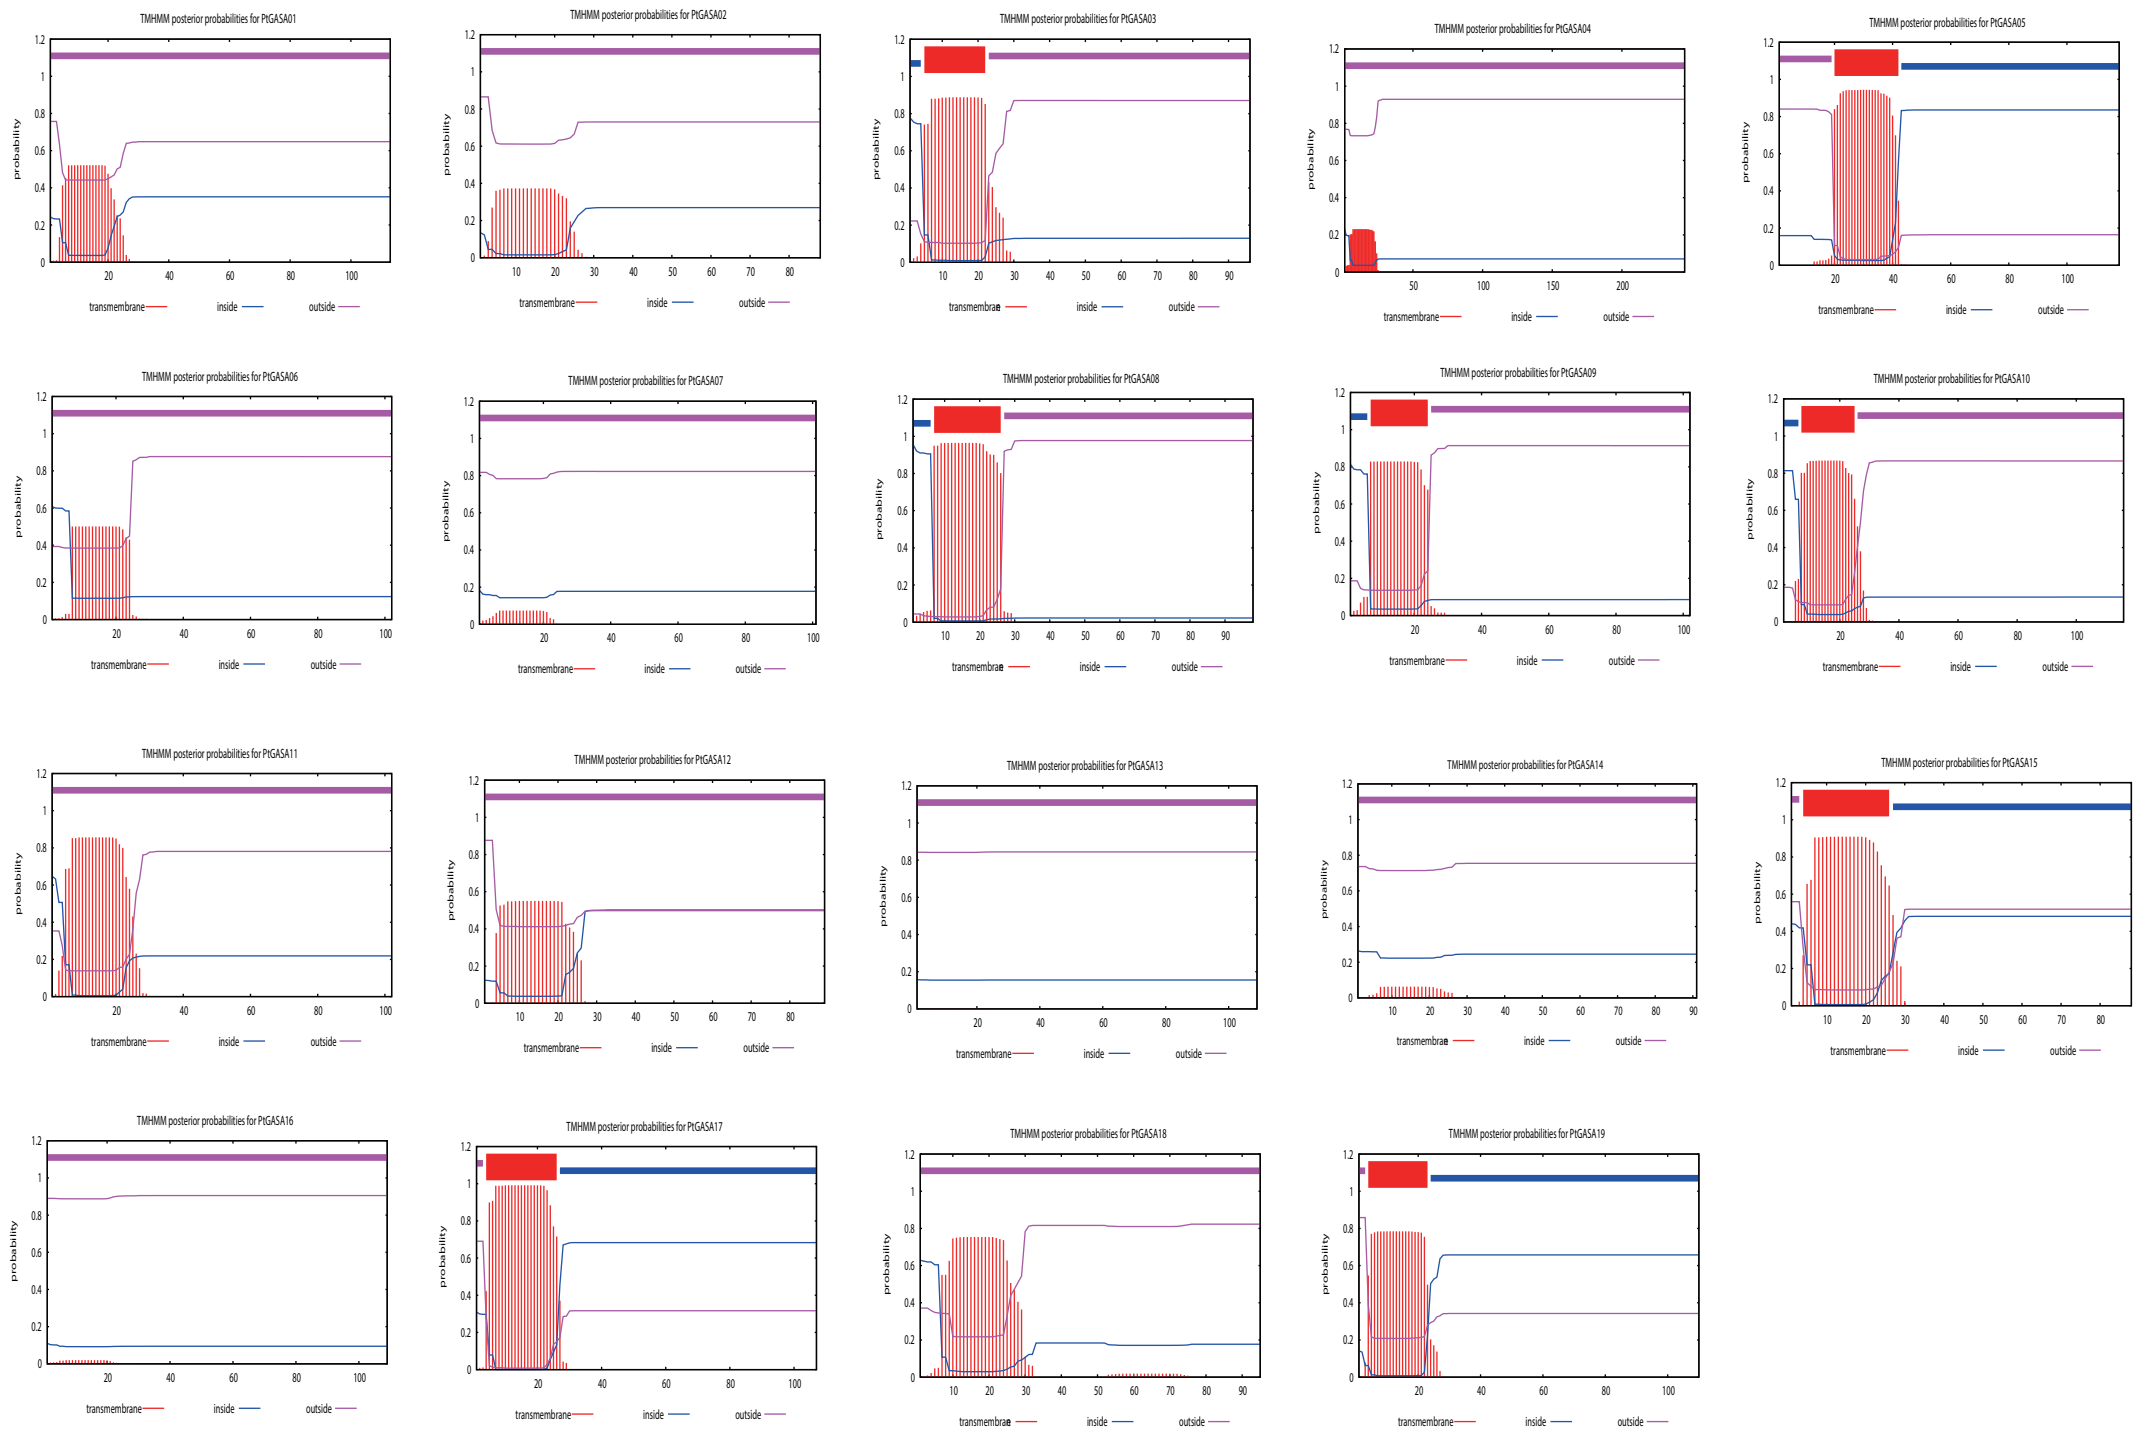

Figure S1. Analysis of the transmembrane region of *PIGASA* proteins

Supplement: s1 [file s1]
